# Supplementary material for: Valproic acid inhibits interferon-γ production by NK cells and increases susceptibility to Listeria monocytogenes infection
Source: PubMed Central journal article supplement (PMC7576816; doi:10.1038/s41598-020-74836-w), 2020-10-20
Supplement: 41598_2020_74836_MOESM1_ESM.pdf [file 41598_2020_74836_MOESM1_ESM.pdf]

**Valproic acid inhibits interferon- $\gamma$  production by NK cells and increases susceptibility to *Listeria monocytogenes* infection**

Rodolfo Soria-Castro<sup>1</sup>, Alma D. Chávez-Blanco<sup>2</sup>, Blanca Estela García-Pérez<sup>1,3</sup>, Isabel Wong-Baeza<sup>1</sup>, Raúl Flores-Mejía<sup>4</sup>, Fabián Flores-Borja<sup>5</sup>, Sergio Estrada-Parra<sup>1</sup>, Iris Estrada-García<sup>1</sup>, Jeanet Serafín-López<sup>1\*</sup>, Rommel Chacón-Salinas<sup>1\*</sup>.

1. Departamento de Inmunología, Escuela Nacional de Ciencias Biológicas, Instituto Politécnico Nacional (ENCB-IPN), Mexico City, Mexico.

2. Subdirección de Investigación Básica, Instituto Nacional de Cancerología (INCan), México City, Mexico.

3. Departamento de Microbiología, Escuela Nacional de Ciencias Biológicas, Instituto Politécnico Nacional (ENCB-IPN), Mexico City, Mexico.

4. Laboratorio 103, Sección de Estudios de Posgrado e Investigación, Escuela Superior de Medicina, Instituto Politécnico Nacional (ESM-IPN), Mexico City, Mexico.

5. Centre for Immunobiology and Regenerative Medicine. Barts & The London School of Medicine and Dentistry. Queen Mary University of London. London, United Kingdom.

\* Corresponding authors at:

Departamento de Inmunología, Escuela Nacional de Ciencias Biológicas, Instituto Politécnico Nacional, Carpio y Plan de Ayala s/n Col. Santo Tomás, Mexico city. C.P. 11340, México.

Phone:+525557296300 ext. 62507

E-mail addresses: [jeaserafin@hotmail.com](mailto:jeaserafin@hotmail.com) (J. Serafín-Lopez),

[rommelchacons@yahoo.com.mx](mailto:rommelchacons@yahoo.com.mx), [rchacons@ipn.mx](mailto:rchacons@ipn.mx) (R. Chacón-Salinas)

## Supplementary figures

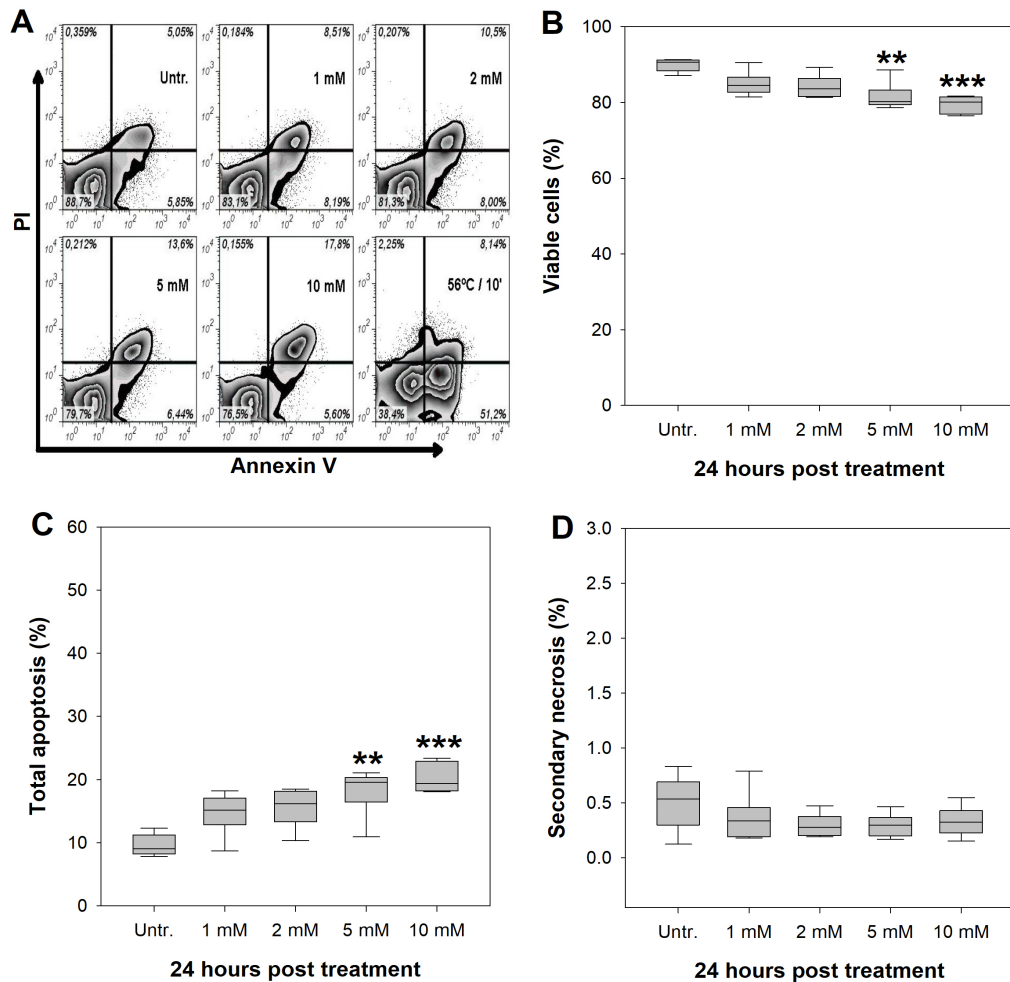

**Supplementary Figure S1. Evaluation of the effect of valproic acid on the viability of spleen cells.**  $1 \times 10^6$  Spleen cells from BALB/c mice were treated with different doses of VPA for 24 h. Cell viability was determined with Annexin V and propidium iodide (PI) staining and measured by flow cytometry. (A) Representative zebra-plots of splenocytes staining with Annexin V and PI. (B) Percentage of viable cells after VPA treatment (Annexin V-/PI-). (C) Percentage of total apoptotic cells represented as the sum of the percentage of early apoptotic cells (Annexin V+/PI-) and the percentage of late apoptotic cells (Annexin V+/PI+). (D) Percentage of necrotic cells (Annexin V-/PI-). (n=6 per group; \*\*P<0.01, \*\*\*P<0.001). Data are expressed as median and range; Kruskal-Wallis.

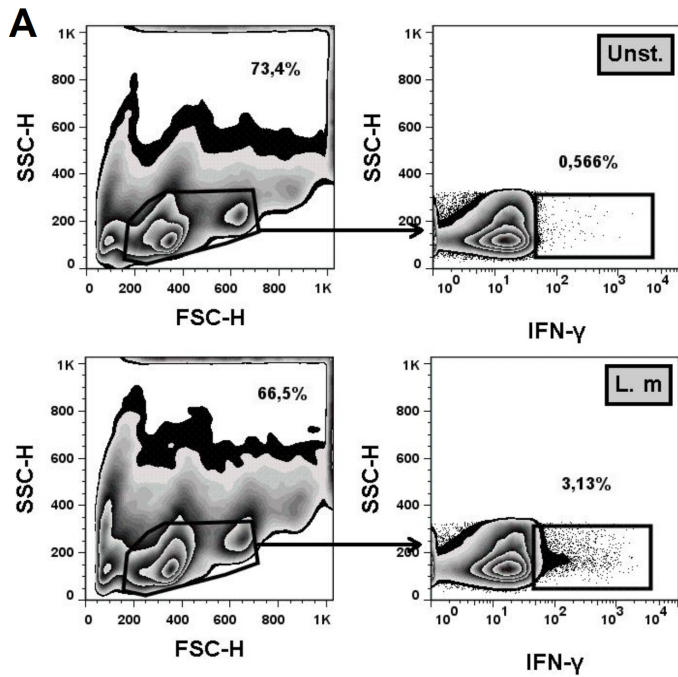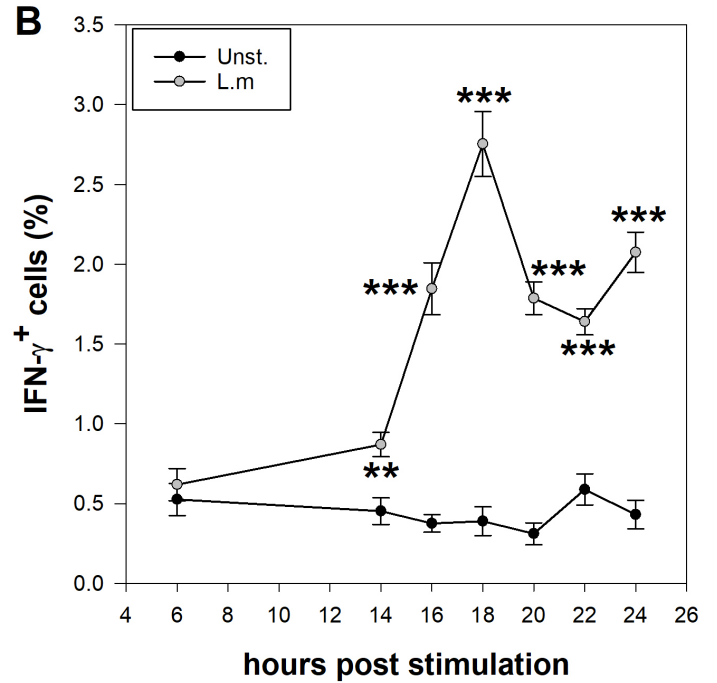

**Supplementary Figure S2. Kinetics of IFN- $\gamma$ -producing lymphocytes in response to *Listeria monocytogenes* infection *in vitro*.**  $1 \times 10^6$  splenocytes were infected with L.m and the percentage of IFN- $\gamma$ -producing lymphocytes was evaluated at different time points by flow cytometry. (A) Representative zebra plots showing the frequency of IFN- $\gamma$ + lymphocytes in uninfected and L.m-infected cultures. (B) Kinetics of total IFN- $\gamma$ -producing lymphocytes (n=3 per group; \*\*P<0.01, 6 h vs 14 h and \*\*\*P<0.001, 6 h vs 16, 18, 20, 22 and 24 h in L.m group). Data are expressed as mean  $\pm$  s.e.m; two way-RM ANOVA.

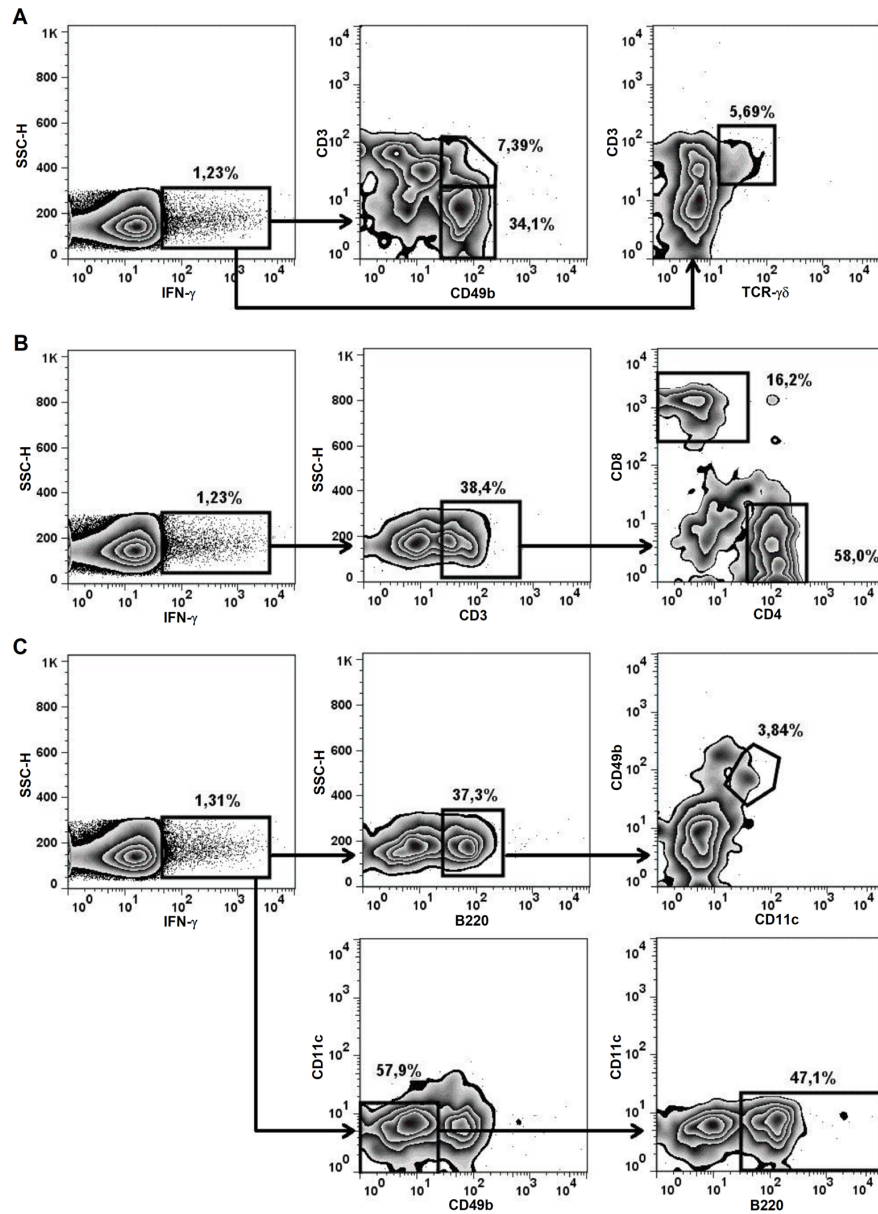

**Supplementary Figure S3. Identification of IFN- $\gamma$ -producing splenocyte cell populations during *Listeria monocytogenes in vitro* infection.**  $1 \times 10^6$  splenocytes were infected with *L.m* for 18h and the percentage of the different IFN- $\gamma$ -producing cells was evaluated by flow cytometry. (A) Representative zebra plots showing the percentage of NK (CD3<sup>-</sup> CD49b<sup>+</sup>), NKT (CD3<sup>+</sup> CD49b<sup>+</sup>) and  $\gamma\delta$  T cells (CD3<sup>+</sup> TCR $\gamma\delta$ ); (B) CD3<sup>+</sup>CD4<sup>+</sup> and CD3<sup>+</sup>CD8<sup>+</sup> T cells; and (C) IKDC (B220<sup>+</sup> CD11c<sup>-</sup> CD49b<sup>+</sup>) and B cells (CD11c<sup>-</sup> CD49b<sup>-</sup> B220<sup>+</sup>) within total IFN- $\gamma$ -producing lymphocytes.

**Supplementary Table S1. Total number of IFN- $\gamma$  producing cells in BALB/C spleen during *Listeria monocytogenes* infection *in vitro*.**

| IFN- $\gamma$ <sup>+</sup> cells/1x10 <sup>6</sup> splenocytes | Uninfected                                                 | <i>Listeria monocytogenes</i>                              |          |
|----------------------------------------------------------------|------------------------------------------------------------|------------------------------------------------------------|----------|
|                                                                | Median and (25 <sup>th</sup> -75 <sup>th</sup> percentile) | Median and (25 <sup>th</sup> -75 <sup>th</sup> percentile) | *P value |
| NK cells                                                       | 62.5 (45-86.25)                                            | 2782.5 (1727.5-3342.5)                                     | 0.002    |
| NKT cells                                                      | 110 (65-131.25)                                            | 435 (306.25-682.5)                                         | 0.002    |
| T $\gamma$ $\delta$ cells                                      | 147.5 (86.25-216.25)                                       | 317.5 (201.25-508.75)                                      | 0.015    |
| CD4 T cells                                                    | 600 (317.5-687.5)                                          | 1105 (707.5-2057.5)                                        | 0.041    |
| CD8 T cells                                                    | 127.5 (98.75-233.75)                                       | 212.5 (112.5-400)                                          | 0.394    |
| IKDC                                                           | 35 (30-56.25)                                              | 45 (25-111.25)                                             | 0.485    |
| B cells                                                        | 1492.5 (1370-2140)                                         | 1220 (1043.75-3337.5)                                      | 0.589    |

\* U Mann-Whitney with Yates correction
